# Supplementary material for: Multishell Diffusion MRI Reflects Improved Physical Fitness Induced by Dance Intervention
Source: Neural Plast. 2020 Nov 5;2020:8836925. doi: 10.1155/2020/8836925 (PMC7661125; doi:10.1155/2020/8836925)
Supplement: Supplementary Materials — Table S1: DI group and HC and MCI subgroups; mean ± standard deviation. Table S2: LAU group and HC and MCI subgroups; mean ± standard deviation. Table S3: mixed ANOVA—behavioral, cognitive (FDR-corrected), and DTI (FDR-corrected) results. ∗Significant. WM: white matter; CST: corticospinal tract; SLF: superior longitudinal fasciculus; FA: fractional anisotropy; MD: mean diffusivity. Table S4: paired t-tests: DI-induced changes in the DI group—behavioral, cognitive (FDR-corrected), and DTI (FDR-corrected) results; mean ± standard deviation. ∗Significant. WM: white matter; CST: corticospinal tract; SLF: superior longitudinal fasciculus; FA: fractional anisotropy; MD: mean diffusivity. MD unit (10−3 mm2 s−1). Table S5: partial correlations (Spearman correlation coefficient; MATLAB 2018) between changes in clinical measures of interest (i.e., those that revealed significant time∗group effects) and changes in FA and MD parameters in the WM in the DI group; p value/correlation coefficient. ∗Significant. WM: white matter; CST: corticospinal tract; SLF: superior longitudinal fasciculus; FA: fractional anisotropy; MD: mean diffusivity. [file 8836925.f1.zip]

Archive with 2 entries (2 files):
- 8836925 -Supplementary description.docx
- Sejnoha_Minsterova_supplementary.docx
